# Supplementary material
Source: MDPI journal article supplement (https://www.mdpi.com/2673-4060/1/1/3)
Supplement: s1 [file s1]

## Sheet: Information
	Supplemental Data for "How do people move around? National data on transport modal shares for 131 countries"
		This file includes land-based transport data for 131 countries. Countries are different in terms of data availability, and three sets of data are reported here.
		Full modal shares
			This worksheet includes transport modal shares by bus/coach, rail, and passenger car for 66 countries. Information are based on public sources.
		Passenger car shares
			This worksheet includes transport modal shares by public transport share vs. passenger car share.
			Public transport shares include those usages by bus/coach and rail.
			For some countries, the data is only available for passenger car share at the metro cities; for others, the results are not available, and an estimated figure based on the regression analysis is used here.
			A total of 65 countries are reported.
		Vehicle shares
			Shares of vehicle fleet by transport mode: other vehicles and cars.
			This includes informaiton for 131 countries.

## Sheet: Full modal shares
Country name	Modal Share
	Bus/Coach	Rail	Passenger Car
Afghanistan	0.676	0	0.324
Argentina	0.29	0.15	0.57
Australia	0.07	0.05	0.88
Austria	0.17	0.16	0.67
Bahrain	0.13	0	0.87
Bangladesh	0.671	0.04	0.289
Belarus	0.66	0.33	0.01
Belgium	0.1	0.08	0.82
Bolivia (Plurinational State of)	0.755	0.08	0.165
Bosnia-Herzegovina	0.28	0.02	0.7
Bulgaria	0.13	0.02	0.85
Canada	0.03	0	0.97
Chile	0.29	0.19	0.52
China	0.322	0.325	0.353
Croatia	0.14	0.02	0.84
Czech Republic	0.11	0.1	0.79
Denmark	0.09	0.09	0.82
Egypt	0.273	0.067	0.66
Estonia	0.17	0.02	0.81
Finland	0.1	0.06	0.84
France	0.06	0.12	0.82
Georgia	0.25	0.08	0.67
Germany	0.07	0.09	0.84
Greece	0.14	0.04	0.82
Hungary	0.19	0.09	0.72
India	0.52	0.06	0.42
Ireland	0.14	0.03	0.83
Israel	0.14	0	0.86
Italy	0.12	0.06	0.82
Japan	0.05	0.34	0.63
Kazakhstan	0.6602	0.0769	0.2629
South Korea	0.22	0.19	0.59
Kyrgyzstan	0.941	0.0095	0.0495
Latvia	0.14	0.03	0.83
Lebanon	0.127	0	0.873
Liechtenstein	0.17	0	0.83
Lithuania	0.08	0.01	0.91
Luxembourg	0.12	0.05	0.83
Malaysia	0.1061	0.1439	0.75
Malta	0.18	0	0.82
Mexico	0.6	0	0.4
Moldova	0.17	0.03	0.8
Nepal	0.478	0	0.522
Netherlands	0.013	0.086	0.901
New Zealand	0.0268	0.0076	0.9656
Nigeria	0.448	0.003	0.549
North Macedonia	0.19	0.01	0.8
Norway	0.09	0.06	0.85
Pakistan	0.464	0.108	0.428
Philippines	0.5376	0.0547	0.4077
Poland	0.12	0.08	0.84
Portugal	0.11	0.04	0.85
Romania	0.15	0.05	0.8
Singapore	0.3685	0.2077	0.4238
Slovak Republic	0.16	0.1	0.74
Slovenia	0.11	0.03	0.87
Spain	0.12	0.07	0.82
Sri Lanka	0.481	0.034	0.485
Sweden	0.08	0.1	0.83
Switzerland	0.06	0.17	0.77
Taiwan	0.102	0.08	0.818
Tajikistan	0.9014	0.0668	0.0318
Turkey	0.28	0.02	0.7
United Kingdom	0.048	0.102	0.85
United States	0.085	0.005	0.91
Vietnam	0.09	0.05	0.86

## Sheet: Passenger car shares
Country name	Modal Share
	Public transport (coach, bus, rail)	Passenger Car
Angola	0.46187	0.53813
Antigua and Barbuda	0.31744	0.68256
Aruba	0.26189	0.73811
Bahamas	0.25179	0.74821
Barbados	0.30431	0.69569
Belize	0.44066	0.55934
Benin	0.60024	0.39976
Botswana	0.37703	0.62297
Brazil	0.3981	0.6019
Burkina Faso	0.62347	0.37653
Cabo Verde	0.45581	0.54419
Cambodia	0.57196	0.42804
Cameroon	0.5457	0.4543
Colombia	0.5104	0.4896
Costa Rica	0.35582	0.64418
Côte d'Ivoire	0.53661	0.46339
Dominican Republic	0.38511	0.61489
Ecuador	0.7431	0.2569
El Salvador	0.46086	0.53914
Fiji	0.42955	0.57045
Gabon	0.36087	0.63913
Ghana	0.52954	0.47046
Guatemala	0.23	0.77
Guinea-Bissau	0.63458	0.36542
Haiti	0.61741	0.38259
Honduras	0.50732	0.49268
Hong Kong	0.21846	0.78154
Indonesia	0.36	0.64
Iraq	0.41036	0.58964
Jamaica	0.42753	0.57247
Jordan	0.46591	0.53409
Kenya	0.57095	0.42905
Kuwait	0.23058	0.76942
Lao People's Democratic Republic	0.53156	0.46844
Libya	0.38713	0.61287
Mali	0.61236	0.38764
Mauritius	0.35077	0.64923
Mongolia	0.44571	0.55429
Mozambique	0.63862	0.36138
Myanmar	0.54469	0.45531
Nicaragua	0.51742	0.48258
Niger	0.67902	0.32098
Oman	0.30532	0.69468
Panama	0.735	0.265
Papua New Guinea	0.49318	0.50682
Paraguay	0.41743	0.58257
Peru	0.62	0.38
Puerto Rico	0.24977	0.75023
Qatar	0.16594	0.83406
Russian Federation	0.4075	0.5925
Rwanda	0.61034	0.38966
Saudi Arabia	0.27906	0.72094
Senegal	0.54469	0.45531
South Africa	0.3873	0.6127
Thailand	0.3	0.7
Togo	0.62751	0.37249
Trinidad and Tobago	0.31037	0.68963
Uganda	0.62246	0.37754
United Arab Emirates	0.21139	0.78861
United Republic of Tanzania	0.59216	0.40784
Uruguay	0.45	0.55
Venezuela (Bolivarian Republic of)	0.5664	0.4336
Yemen	0.62044	0.37956
Zambia	0.53459	0.46541
Zimbabwe	0.56186	0.43814

## Sheet: Vehicle shares
Country name	Vehicle Share
	Other vehicles	Car
Afghanistan	0.4229	0.5771
Angola	0.4653	0.5347
Antigua and Barbuda	0.3336	0.6664
Argentina	0.2419	0.7581
Aruba	0.3336	0.6664
Australia	0.2188	0.7812
Austria	0.109	0.891
Bahamas	0.455	0.545
Bahrain	0.1364	0.8636
Bangladesh	0.4323	0.5677
Barbados	0.0651	0.9349
Belarus	0.1949	0.8051
Belgium	0.1352	0.8648
Belize	0.3647	0.6353
Benin	0.192	0.808
Bolivia (Plurinational State of)	0.6932	0.3068
Bosnia-Herzegovina	0.2962	0.7038
Botswana	0.4851	0.5149
Brazil	0.1524	0.8476
Bulgaria	0.2245	0.7755
Burkina Faso	0.4352	0.5648
Cabo Verde	0.2772	0.7228
Cambodia	0.1429	0.8571
Cameroon	0.292	0.708
Canada	0.1996	0.8004
Chile	0.3926	0.6074
China	0.3974	0.6026
Colombia	0.4735	0.5265
Costa Rica	0.3054	0.6946
Côte d'Ivoire	0.6098	0.3902
Croatia	0.1115	0.8885
Czech Republic	0.1798	0.8202
Denmark	0.1894	0.8106
Dominican Republic	0.4772	0.5228
Ecuador	0.6388	0.3612
Egypt	0.3551	0.6449
El Salvador	0.2005	0.7995
Estonia	0.2221	0.7779
Fiji	0.3705	0.6295
Finland	0.284	0.716
France	0.1839	0.8161
Gabon	0.4921	0.5079
Georgia	0.3231	0.6769
Germany	0.0985	0.9015
Ghana	0.3973	0.6027
Greece	0.1482	0.8518
Guatemala	0.6508	0.3492
Guinea-Bissau	0.1818	0.8182
Haiti	0.5	0.5
Honduras	0.75	0.25
Hong Kong	0.2839	0.7161
Hungary	0.1735	0.8265
India	0.3417	0.6583
Indonesia	0.4875	0.5125
Iraq	0.6559	0.3441
Ireland	0.1323	0.8677
Israel	0.1888	0.8112
Italy	0.1312	0.8688
Jamaica	0.2105	0.7895
Japan	0.2345	0.7655
Jordan	0.1457	0.8543
Kazakhstan	0.1817	0.8183
Kenya	0.4655	0.5345
South Korea	0.2747	0.7253
Kuwait	0.1257	0.8743
Kyrgyzstan	0.5289	0.4711
Lao PDR	0.9	0.1
Latvia	0.1954	0.8046
Lebanon	0.1654	0.8346
Libya	0.346	0.654
Liechtenstein	0.0293	0.9707
Lithuania	0.0811	0.9189
Luxembourg	0.1028	0.8972
Malaysia	0.1779	0.8221
Mali	0.2379	0.7621
Malta	0.202	0.798
Mauritius	0.2339	0.7661
Mexico	0.315	0.685
Moldova	0.3073	0.6927
Mongolia	0.3239	0.6761
Mozambique	0.3071	0.6929
Myanmar	0.4762	0.5238
Nepal	0.268	0.732
Netherlands	0.1369	0.8631
New Zealand	0.2193	0.7807
Nicaragua	0.77	0.23
Niger	0.13	0.87
Nigeria	0.0825	0.9175
North Macedonia	0.2123	0.7877
Norway	0.2064	0.7936
Oman	0.2315	0.7685
Pakistan	0.1826	0.8174
Panama	0.3077	0.6923
Papua New Guinea	0.5385	0.4615
Paraguay	0.5636	0.4364
Peru	0.4148	0.5852
Philippines	0.4463	0.5537
Poland	0.214	0.786
Portugal	0.1724	0.8276
Puerto Rico	0.2035	0.7965
Qatar	0.2895	0.7105
Romania	0.2441	0.7559
Russia	0.2434	0.7566
Rwanda	0.676	0.324
Saudi Arabia	0.3341	0.6659
Senegal	0.5498	0.4502
Singapore	0.2066	0.7934
Slovak Republic	0.2208	0.7792
Slovenia	0.0876	0.9124
South Africa	0.3495	0.6505
Spain	0.189	0.811
Sri Lanka	0.6251	0.3749
Sweden	0.1298	0.8702
Switzerland	0.1036	0.8964
Taiwan	0.1437	0.8563
Tajikistan	0.2368	0.7632
Tanzania	0.3985	0.6015
Thailand	0.5903	0.4097
Togo	0.6094	0.3906
Trinidad and Tobago	0.1184	0.8816
Turkey	0.3894	0.6106
Uganda	0.7335	0.2665
United Arab Emirates	0.1065	0.8935
United Kingdom	0.1722	0.8278
United States	0.5109	0.4891
Uruguay	0.2421	0.7579
Venezuela BR	0.2319	0.7681
Viet Nam	0.2566	0.7434
Yemen	0.4838	0.5162
Zambia	0.3796	0.6204
Zimbabwe	0.117	0.883

## Sheet: Data year
Country name	Year
Tajikistan	1999
Nigeria	2003
Ecuador	2004
Pakistan	2004
Peru	2004
India	2007
Greece	2008
Netherlands	2008
Portugal	2008
Vietnam	2008
Afghanistan	2009
Canada	2009
Indonesia	2009
Lebanon	2009
Thailand	2009
Uruguay	2009
Venezuela (Bolivarian Republic of)	2009
Colombia	2010
Egypt	2010
Liechtenstein	2010
New Zealand	2010
Slovenia	2010
Nepal	2011
Brazil	2012
Kyrgyzstan	2012
Mexico	2012
Bangladesh	2014
Georgia	2014
South Africa	2014
Sri Lanka	2014
Chile	2015
Bahrain	2016
Belgium	2016
Bolivia (Plurinational State of)	2016
Denmark	2016
Israel	2016
Norway	2016
Spain	2016
Taiwan	2016
Argentina	2017
Bosnia-Herzegovina	2017
Bulgaria	2017
China	2017
Croatia	2017
Estonia	2017
Germany	2017
Ireland	2017
Japan	2017
Latvia	2017
Luxembourg	2017
Malaysia	2017
Malta	2017
Moldova	2017
Philippines	2017
Romania	2017
South Korea	2017
Switzerland	2017
Turkey	2017
United States	2017
Australia	2018
Austria	2018
Belarus	2018
Czech Republic	2018
Finland	2018
France	2018
Hungary	2018
Italy	2018
Kazakhstan	2018
Lithuania	2018
North Macedonia	2018
Poland	2018
Slovak Republic	2018
Sweden	2018
United Kingdom	2018
Singapore	2019
Angola	Estimated from regression
Antigua and Barbuda	Estimated from regression
Aruba	Estimated from regression
Bahamas	Estimated from regression
Barbados	Estimated from regression
Belize	Estimated from regression
Benin	Estimated from regression
Botswana	Estimated from regression
Burkina Faso	Estimated from regression
Cabo Verde	Estimated from regression
Cambodia	Estimated from regression
Cameroon	Estimated from regression
Costa Rica	Estimated from regression
Côte d'Ivoire	Estimated from regression
Dominican Republic	Estimated from regression
El Salvador	Estimated from regression
Fiji	Estimated from regression
Gabon	Estimated from regression
Ghana	Estimated from regression
Guatemala	Estimated from regression
Guinea-Bissau	Estimated from regression
Haiti	Estimated from regression
Honduras	Estimated from regression
Hong Kong	Estimated from regression
Iraq	Estimated from regression
Jamaica	Estimated from regression
Jordan	Estimated from regression
Kenya	Estimated from regression
Kuwait	Estimated from regression
Lao People's Democratic Republic	Estimated from regression
Libya	Estimated from regression
Mali	Estimated from regression
Mauritius	Estimated from regression
Mongolia	Estimated from regression
Mozambique	Estimated from regression
Myanmar	Estimated from regression
Nicaragua	Estimated from regression
Niger	Estimated from regression
Oman	Estimated from regression
Panama	Estimated from regression
Papua New Guinea	Estimated from regression
Paraguay	Estimated from regression
Puerto Rico	Estimated from regression
Qatar	Estimated from regression
Russian Federation	Estimated from regression
Rwanda	Estimated from regression
Saudi Arabia	Estimated from regression
Senegal	Estimated from regression
Togo	Estimated from regression
Trinidad and Tobago	Estimated from regression
Uganda	Estimated from regression
United Arab Emirates	Estimated from regression
United Republic of Tanzania	Estimated from regression
Yemen	Estimated from regression
Zambia	Estimated from regression
Zimbabwe	Estimated from regression
